# Supplementary material for: Controlled synthesis of MnxFe1−xO concave nanocubes and highly branched cubic mesocrystals
Source: Royal Society of Chemistry journal article supplement (doi:10.1039/c3ce41618f), 2013-10-16
Supplement: c3ce41618f.pdf [file c3ce41618f.pdf]

# Controlled synthesis of $Mn_xFe_{1-x}O$ concave nanocubes and highly branched cubic mesocrystals

Zhenhu Li, Yurong Ma\* and Limin Qi\*

## Supporting Information

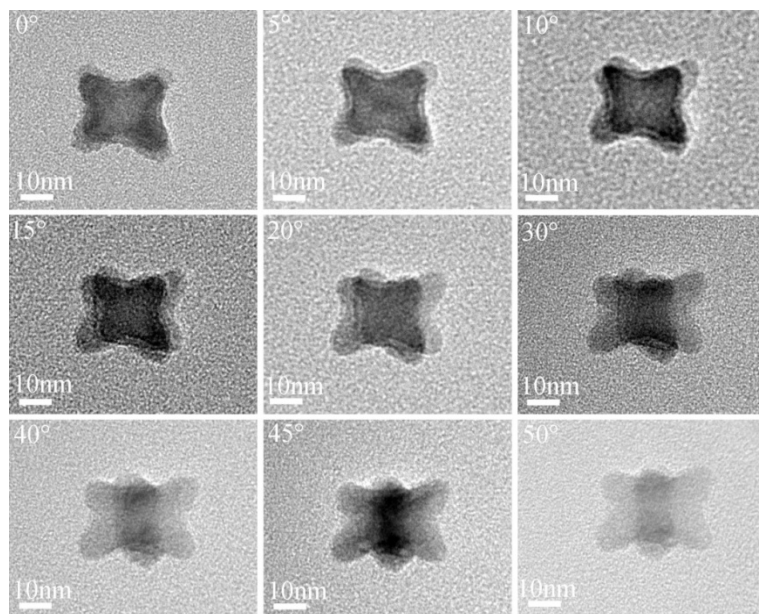

Fig. S1. TEM images of one of the  $Mn_{0.15}Fe_{0.85}O$  concave nanocubes (Fig. 1) recorded after tilting the sample holder to different angles.

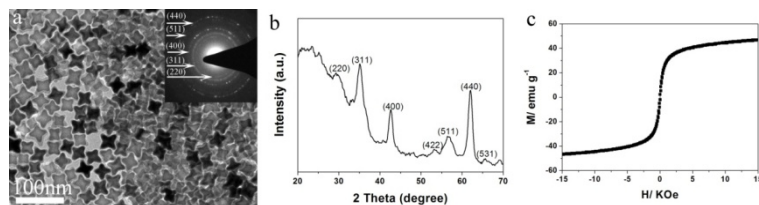

Fig. S2. Characterizations on the  $Mn_xFe_{3-x}O_4$  concave nanocubes obtained while the  $Mn_{0.15}Fe_{0.85}O$  concave nanocubes were exposed to air for 2 hours at 200 °C. (a) TEM image and corresponding SAED pattern, (b) XRD pattern, and (c) Magnetic hysteresis loops.

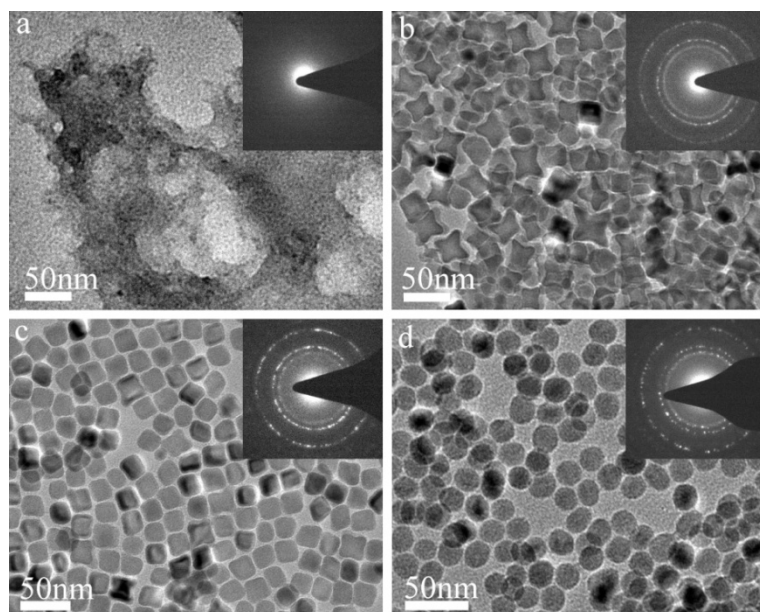

Fig. S3 TEM images of  $\text{Mn}_{0.15}\text{Fe}_{0.85}\text{O}$  NPs obtained with different volume ratios of OA to OAm ( $R_{\text{OA/OAm}}$ ) while remaining the total volume of OA and OAm as 10 mL. The insets show the corresponding SAED patterns. The  $R_{\text{OA/OAm}}$  values are as follows: (a) 1.25, (b) 0.9, (c) 0.8, (d) 0.67.

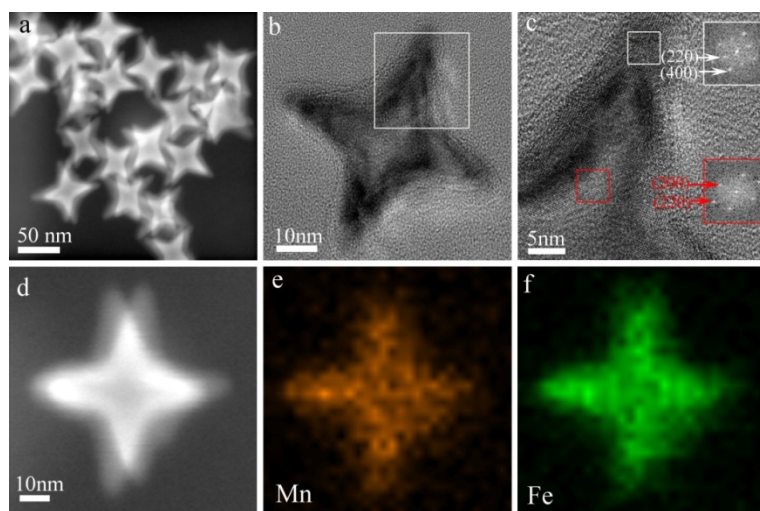

Fig. S4 Characterizations in details on  $\text{Mn}_{0.15}\text{Fe}_{0.85}\text{O}$  concave nanocubes obtained with the concentration sum of metal precursors 0.18 mol/L and heating rate of 5 °C/min (Fig. 3c), (a) TEM, (b, c) high resolution TEM images, (Inset: FFTs of the marked areas corresponding to the red and white boxes, respectively) (d) a HAADF-STEM image, and (e, f) Mn and Fe mappings of a  $\text{Mn}_{0.15}\text{Fe}_{0.85}\text{O}$  concave nanocubes.

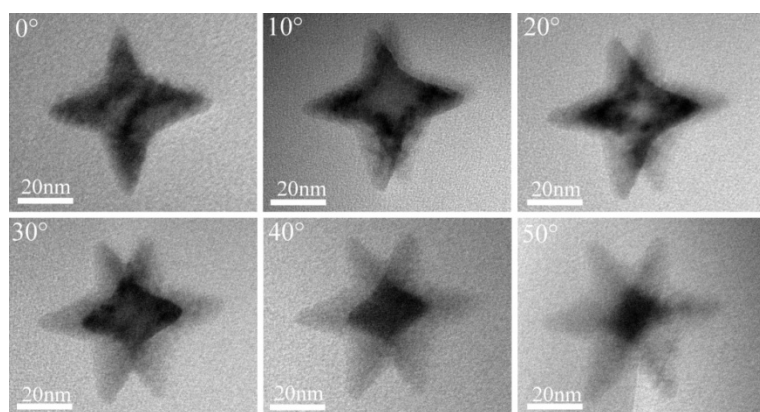

Fig. S5 TEM images of one of the Mn<sub>0.15</sub>Fe<sub>0.85</sub>O concave nanocubes obtained with the concentration sum of metal precursors 0.18 mol/L and heating rate of 5 °C/min (Fig. 3c) recorded after tilting the sample holder in-situ to different angles.

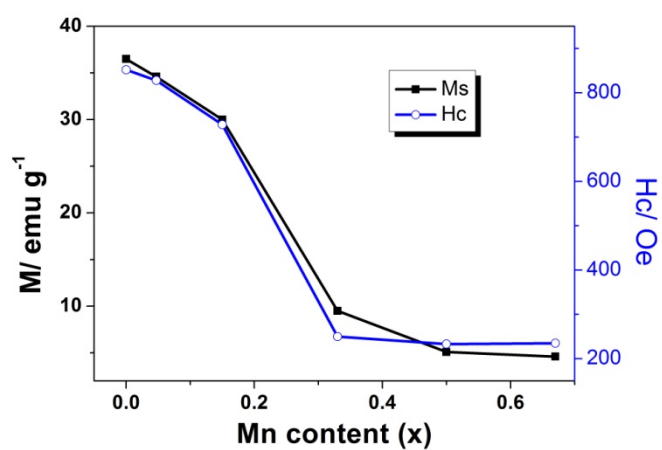

Fig. S6 The relation of the Mn contents (x) and the saturation magnetization (Ms) and coercive field values (Hc) of the obtained Mn<sub>x</sub>Fe<sub>1-x</sub>O nanoparticles characterized at 2 T and 5 K.

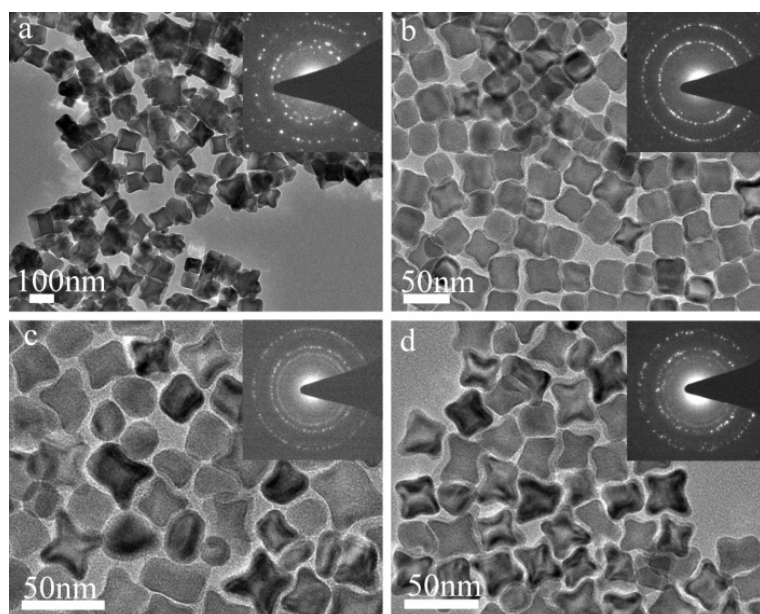

Fig. S7 TEM images of  $\text{Mn}_{0.15}\text{Fe}_{0.85}\text{O}$  nanoparticles obtained when the heating time for the first step heating process at  $200^\circ\text{C}$  was varied from 0 to 60 min while keeping the second step heating time at  $300^\circ\text{C}$  to be 60 min. The insets show the corresponding SAED patterns. (a) 0, (b) 10 min, (c) 30 min, (d) 40 min.

Scheme S1. Schematic illustration of the formation mechanism for the  $\text{Mn}_x\text{Fe}_{1-x}\text{O}$  concave nanocubes.

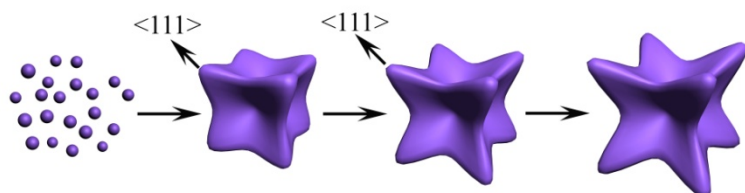



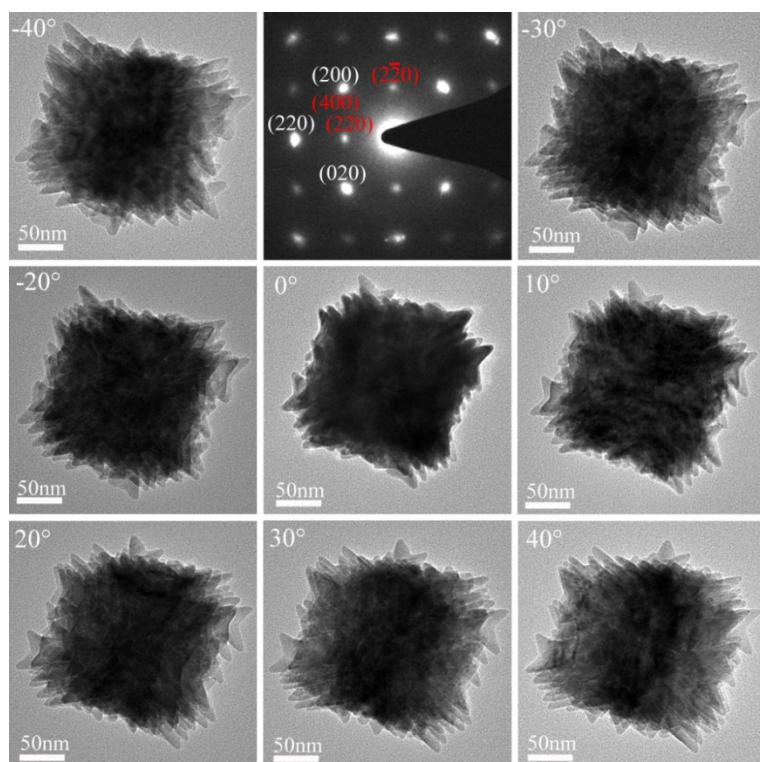

Fig. S8. TEM images of one of the highly branched cubic  $\text{Mn}_{0.15}\text{Fe}_{0.85}\text{O}$  mesocrystals (Fig. 7) recorded after tilting the sample holder to different angles. The SAED pattern related to the image obtained at  $-40^\circ$  shows crystal facets indexes in white and red corresponding to  $\text{Mn}_x\text{Fe}_{1-x}\text{O}$  rock salt phase and  $\text{Mn}_x\text{Fe}_{3-x}\text{O}_4$  spinel phases, respectively).

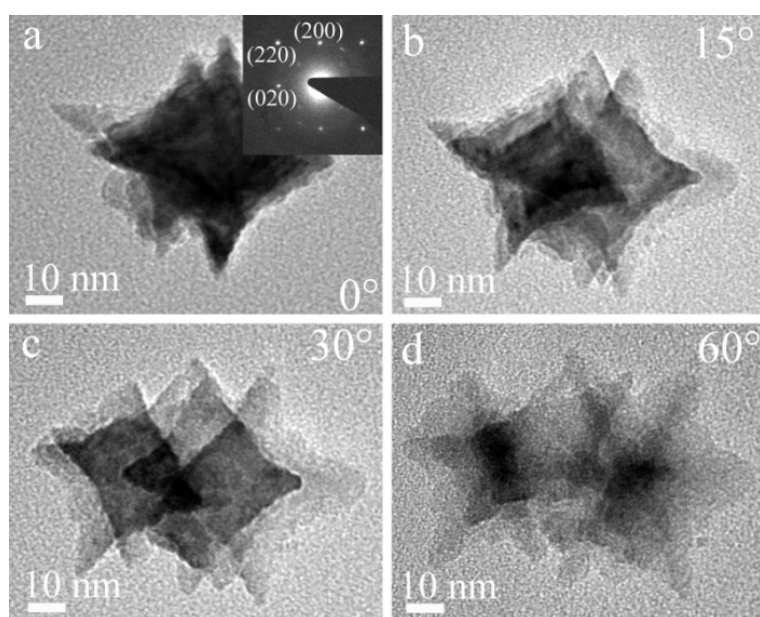

Fig. S9. TEM images of one of the highly branched cubic  $\text{Mn}_{0.15}\text{Fe}_{0.85}\text{O}$  mesocrystals after aging at  $300^\circ\text{C}$  for 30 min (Fig. 8c) recorded after tilting the sample holder to different angles. The inset in (a) shows the SAED pattern

corresponding to planes of  $Mn_xFe_{1-x}O$  rock salt phase.

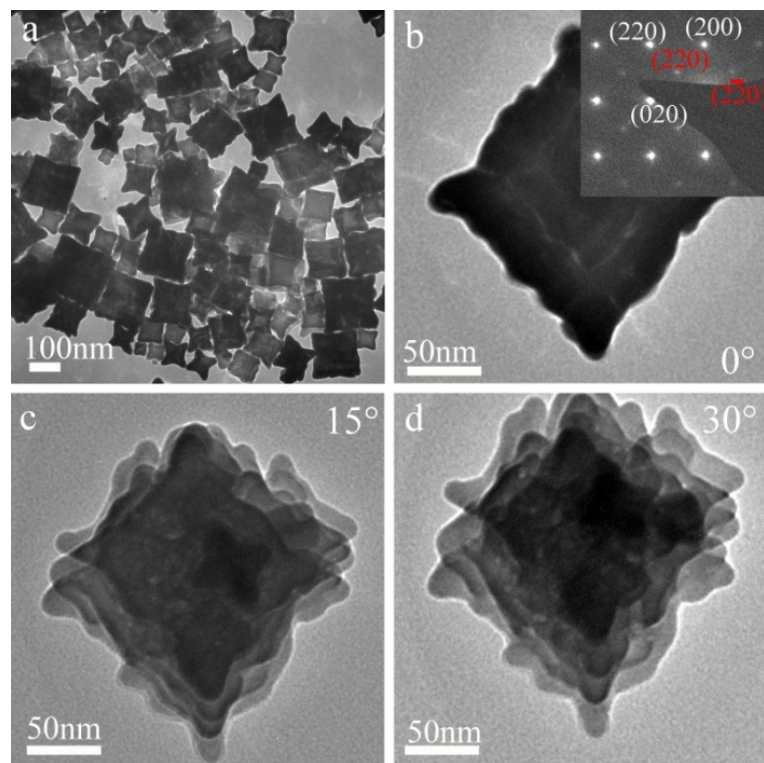

Fig. S10 TEM images of the highly branched cubic  $Mn_{0.15}Fe_{0.85}O$  mesocrystals after aging at 300 °C for 120 min. (b-d) TEM of one  $Mn_{0.15}Fe_{0.85}O$  mesocrystal recorded after tilting the sample holder to different angles. The inset in (b) shows the SAED pattern with crystal facets indexes in white and red corresponding to  $Mn_xFe_{1-x}O$  rock salt phase and  $Mn_xFe_{3-x}O_4$  spinel phases, respectively.

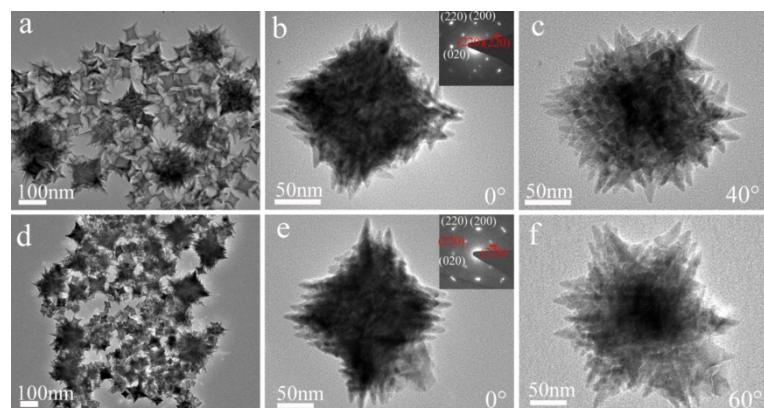

Fig. S11 TEM images of the highly branched cubic  $Mn_{0.15}Fe_{0.85}O$  mesocrystals obtained in the presence of different amounts of 1-octadecene, (a-c) 2.5 ml, (d-f) 7.5 ml. The insets in (b) and (e) show the relative SAED patterns with crystal facets indexes in white and red corresponding to  $Mn_xFe_{1-x}O$  rock salt phase and  $Mn_xFe_{3-x}O_4$

spinel phases, respectively. The images in (c) and (f) were obtained after tilting the mesocrystals in (b) and (e) to different angles, respectively.
